# Supplementary material for: Ultrarestrictive Opioid Prescription Protocol for Pain Management After Gynecologic and Abdominal Surgery
Source: PubMed Central journal article supplement (PMC6324564; doi:10.1001/jamanetworkopen.2018.5452), 2018-12-07
Supplement: jamanetwopen-1-e185452-s001.pdf [file jamanetwopen-1-e185452-s001.pdf]

## Supplementary Online Content

Mark J, Argentieri DM, Gutierrez CA, et al. Ultrarestrictive opioid prescription protocol for pain management after gynecologic and abdominal surgery. *JAMA Netw Open*. 2018;1(8):e185452. doi:10.1001/jamanetworkopen.2018.5452

**eTable.** Patient Characteristics and Outcome Measures

**eFigure.** Opioids Prescribed on Discharge

This supplementary material has been provided by the authors to give readers additional information about their work.

**eTable.** Patient Characteristics and Outcome Measures

| <b>Patient Characteristics</b>                                                      | <b>Pre-UROPP<br/>(N = 626, 50%)</b> | <b>Post-UROPP<br/>(N = 627, 50%)</b> | <b>P Value</b> |
|-------------------------------------------------------------------------------------|-------------------------------------|--------------------------------------|----------------|
| <b>Number of Cases</b>                                                              |                                     |                                      | .84            |
| <i>Laparotomy</i>                                                                   | 146 (23.3%)                         | 144 (23.0%)                          |                |
| <i>Robotic/Laparoscopic</i>                                                         | 279 (44.6%)                         | 272 (43.4%)                          |                |
| <i>Ambulatory</i>                                                                   | 201 (32.1%)                         | 211 (33.6%)                          |                |
| <b>Mean Age (SD) (years)</b>                                                        | 55.5 (13.9)                         | 56.2 (14.6)                          | .41            |
| <b>Race</b>                                                                         |                                     |                                      | .24            |
| <i>Caucasian</i>                                                                    | 546 (87.2%)                         | 547 (87.2%)                          |                |
| <i>African American</i>                                                             | 58 (9.3%)                           | 46 (7.3%)                            |                |
| <i>Asian</i>                                                                        | 8 (1.3%)                            | 10 (1.6%)                            |                |
| <i>Unknown</i>                                                                      | 14 (2.2%)                           | 24 (3.8%)                            |                |
| <b>Mean BMI (SD)</b>                                                                | 33.1 (9.9)                          | 33.0 (10.2)                          | .92            |
| <b>Smoking Status</b>                                                               |                                     |                                      | .98            |
| <i>Former</i>                                                                       | 146 (23.9%)                         | 144 (23.6%)                          |                |
| <i>Yes</i>                                                                          | 112 (18.4%)                         | 114 (18.7%)                          |                |
| <i>No</i>                                                                           | 352 (57.7%)                         | 352 (57.7%)                          |                |
| <b>Mean Prior Abdominal Surgeries (SD)</b>                                          | 1.1 (1.3)                           | 1.2 (1.3)                            | .53            |
| <b>Diagnosis</b>                                                                    |                                     |                                      | .13            |
| <i>Pre-invasive/Benign</i>                                                          | 345 (55.1%)                         | 372 (59.3%)                          |                |
| <i>Malignant</i>                                                                    | 281 (44.9%)                         | 255 (40.7%)                          |                |
| <b>Comprehensive Staging Performed</b>                                              |                                     |                                      | .25            |
| <i>Yes</i>                                                                          | 114 (18.2%)                         | 99 (15.8%)                           |                |
| <i>No</i>                                                                           | 512 (81.8%)                         | 528 (84.2%)                          |                |
| <b>Mean Length of Stay (SD) (days)</b>                                              | 1.2 (1.4)                           | 1.1 (1.5)                            | .49            |
| <b>Chronic Opioid Use</b>                                                           |                                     |                                      | .05            |
| <i>Yes</i>                                                                          | 45 (7.2%)                           | 65 (10.4%)                           |                |
| <i>No</i>                                                                           | 581 (92.8%)                         | 562 (89.6%)                          |                |
| <b>Mean Number of Opioid Doses (Intravenous and Oral) During Admission (SD)</b>     | 2.5 (4.5)                           | 2.9 (5.2)                            | .16            |
| <b>Intraoperative Complications</b>                                                 |                                     |                                      | 1.00           |
| <i>Yes</i>                                                                          | 2 (0.3%)                            | 2 (0.3%)                             |                |
| <i>No</i>                                                                           | 624 (99.7%)                         | 625 (99.7%)                          |                |
| <b>Mean last pain score at time of discharge (SD)*</b>                              | 1.7 (2.4)                           | 1.6 (2.4)                            | .41            |
| <b>Outcome Measures</b>                                                             |                                     |                                      |                |
| <b>Mean postoperative pain score 2 weeks after discharge (SD)*</b>                  | 1.4 (2.3)                           | 1.1 (2.2)                            | .11            |
| <b>Number of patients requesting opioid refill within 30 days after surgery (%)</b> | 104 (16.6)                          | 105 (16.7)                           | .99            |
| <b>Postoperative Complications</b>                                                  |                                     |                                      | .22            |

|            |             |             |  |
|------------|-------------|-------------|--|
| <i>Yes</i> | 42 (6.7%)   | 32 (5.1%)   |  |
| <i>No</i>  | 582 (93.3%) | 595 (94.9%) |  |

\* Pain Score: 0-10 numbered rating, where 0 is no pain and 10 is worst possible pain.

Previously excluded 22 patients for protocol violations have been included in this table. Patients' baseline characteristics and outcome measures between Pre-UROPP and Post-UROPP cohorts were not statistically different with exception of more chronic opioid users in the Post-UROPP group ( $P=.05$ ).

**eFigure. Opioids Prescribed on Discharge**

Supplementary Figure 1

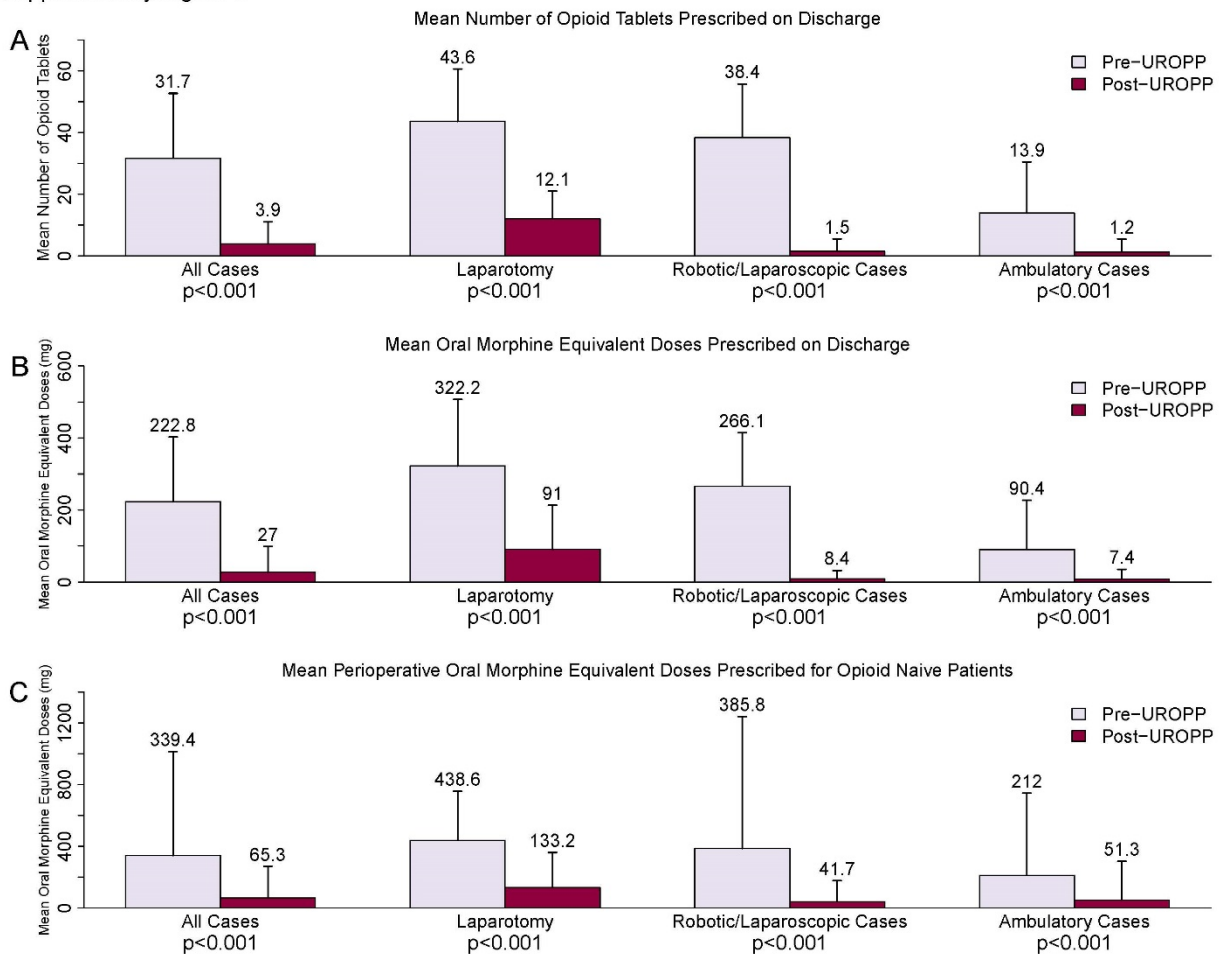

Previously excluded 22 patients for protocol violations have been included in this table **A)** The mean number of opioid containing tablets prescribed on hospital discharge by case types before and after UROPP implementation. The implementation of the UROPP led to a statistically significant reduction in prescribed opioids in all case types ( $P < .001$ ). **B)** Mean oral morphine equivalents (OME) prescribed before and after UROPP implementation in the different case types. **C)** Mean OME prescribed in the total perioperative period (includes 30 days before surgery, discharge, and 30 days after surgery). All pairwise comparisons showed significant ( $P < .001$ ) reduction in dispensed post-UROPP OME. Error bars represent the standard deviation (SD).
